# Supplementary material for: ARD1 contributes to IKKβ-mediated breast cancer tumorigenesis
Source: PubMed Central journal article supplement (PMC6113314; doi:10.1038/s41419-018-0921-2), 2018-08-28

# Supplementary Fig.3

**A**

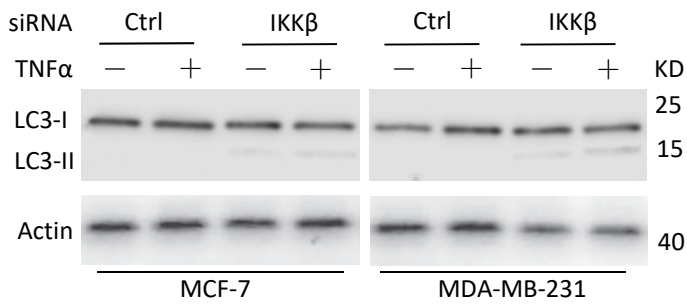

**B**

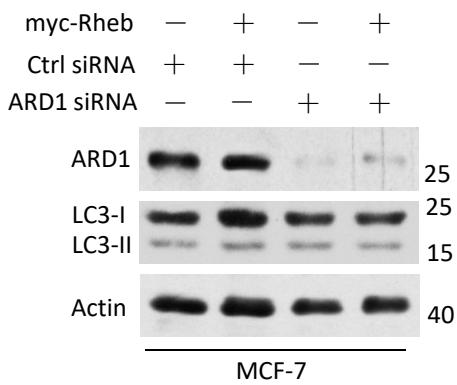

**C**

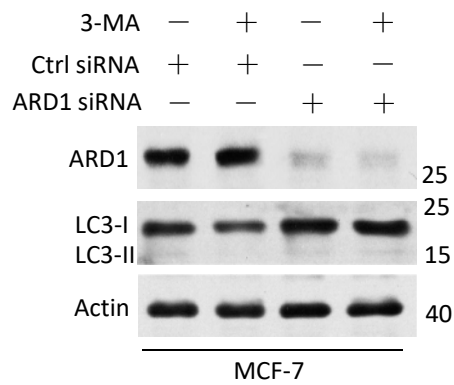

**D**

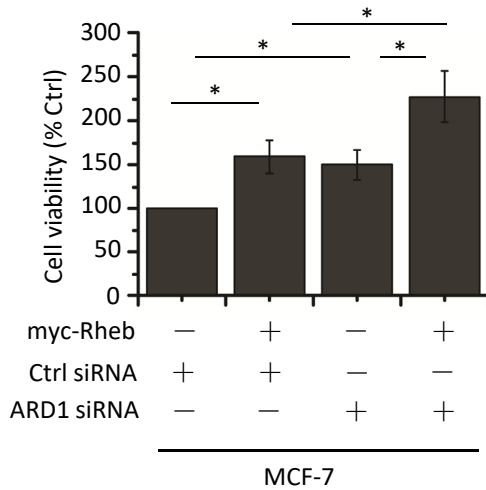

**E**

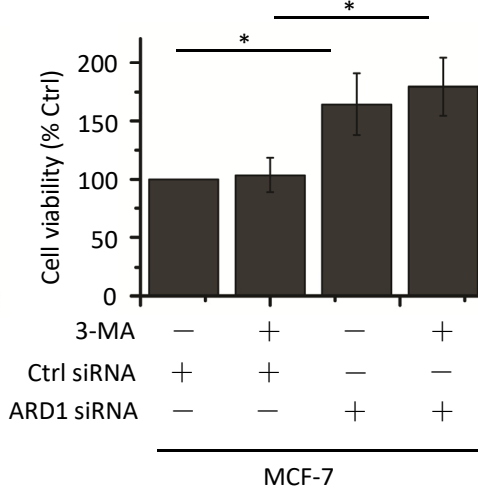

Supplement: 41419_2018_921_MOESM4_ESM.pdf [file 41419_2018_921_MOESM4_ESM.pdf]
